# Supplementary material
Source: PubMed Central journal article supplement (PMC6874720)
Supplement: NIHMS1529243-supplement-Supplemental_Digital_Content_4.pdf [file NIHMS1529243-supplement-Supplemental_Digital_Content_4.pdf]

**Supplementary Table 1.** Patient 20 Cloning Efficiency and Mutant Frequency.

| <b>Sample</b>     | <b>CE (%)</b> | <b>MF (x 10<sup>-6</sup>)</b> |
|-------------------|---------------|-------------------------------|
| Tumor             | n/d           | n/d                           |
| Baseline          | 12.4          | 114.3                         |
| Post-IT-AG        | 6.4           | 88.4                          |
| Post-Ipi (1 mo.)  | 26.6          | 23.1                          |
| Post-Ipi (4 mo.)  | n/a           | n/a                           |
| Post-Ipi (13 mo.) | 10.6          | 87.1                          |

CE; Cloning Efficiency; MF; Mutant Frequency; n/d; assay not done; T-T0, Tumor, freshly cryopreserved; T0, time zero; WT; wild-type; MT mutant; IT-AG, intratumoral  $\alpha$ -gal glycolipids; Ipi, Ipilimumab; mo., months; n/a; data not available.
