# Supplementary material
Source: PubMed Central journal article supplement (PMC6874720)
Supplement: NIHMS1529243-supplement-Supplemental_Digital_Content_5.pdf [file NIHMS1529243-supplement-Supplemental_Digital_Content_5.pdf]

**Supplementary Table 2.** Quality control of RNA used for sequencing of TRB via Illumina MiSeq and number of TRB sequences (total and distinct) for each sample.

| Sample               | # cells culture seeded with | # cells RNA purified from <sup>a</sup> | A260/A280 <sup>b</sup> | RIN <sup>b</sup> | # Total Sequences | # Distinct Sequences |
|----------------------|-----------------------------|----------------------------------------|------------------------|------------------|-------------------|----------------------|
| Tumor T-T0           | n/a                         | 4.4 x 10 <sup>6</sup>                  | 1.66                   | 7.2              | 51,713            | 1,854                |
| Baseline T0          | n/a                         | 5 x 10 <sup>6</sup>                    | 1.78                   | 9.2              | 56,748            | 9,664                |
| Baseline WT          | 0.1 x 10 <sup>6</sup>       | 5.5 x 10 <sup>6</sup>                  | 2.01                   | 8.8              | 58,896            | 2,840                |
| Baseline MT          | 10.5 x 10 <sup>6</sup>      | 5.5 x 10 <sup>6</sup>                  | 1.76                   | 9.6              | 49,826            | 158                  |
| Post-IT-AG T0        | n/a                         | 6 x 10 <sup>6</sup>                    | 1.67                   | 8.9              | 47,602            | 5,162                |
| Post-IT-AG WT        | 0.1 x 10 <sup>6</sup>       | 2 x 10 <sup>6</sup>                    | 1.66                   | 9.1              | 53,435            | 4,585                |
| Post-IT-AG MT        | 5 x 10 <sup>6</sup>         | 2 x 10 <sup>6</sup>                    | 1.78                   | 9.1              | 58,217            | 182                  |
| Post-Ipi (1 mo.) T0  | n/a                         | 7.8 x 10 <sup>6</sup>                  | 1.76                   | 9.1              | 51,983            | 7,528                |
| Post-Ipi (1 mo.) WT  | 0.1 x 10 <sup>6</sup>       | 5 x 10 <sup>6</sup>                    | 1.73                   | 9.1              | 49,799            | 2,709                |
| Post-Ipi (1 mo.) MT  | 10 x 10 <sup>6</sup>        | 5 x 10 <sup>6</sup>                    | 1.80                   | 8.4              | 49,035            | 156                  |
| Post-Ipi (4 mo.) T0  | n/a                         | 13.8 x 10 <sup>6</sup>                 | 1.77                   | 9.3              | 58,588            | 6,006                |
| Post-Ipi (4 mo.) WT  | 0.1 x 10 <sup>6</sup>       | 5 x 10 <sup>6</sup>                    | 1.75                   | 9.0              | 52,277            | 2,091                |
| Post-Ipi (4 mo.) MT  | 20 x 10 <sup>6</sup>        | 5 x 10 <sup>6</sup>                    | 1.86                   | 9.0              | 35,527            | 84                   |
| Post-Ipi (13 mo.) T0 | n/a                         | 2 x 10 <sup>6</sup>                    | 1.83                   | 7.8              | 54,284            | 4,693                |
| Post-Ipi (13 mo.) WT | 0.1 x 10 <sup>6</sup>       | 5 x 10 <sup>6</sup>                    | 1.83                   | 9.8              | 51,711            | 2,209                |
| Post-Ipi (13 mo.) MT | 18 x 10 <sup>6</sup>        | 5 x 10 <sup>6</sup>                    | 1.76                   | 9.8              | 46,575            | 133                  |

<sup>a</sup> RNA was purified with Qiagen RNeasy Mini kits.

<sup>b</sup> Quantity and quality assessed via QUBIT fluorometer and Agilent RNA Pico Chip on a 2100 BioAnalyzer, respectively.

TRB cDNA libraries prepared from 500 ng RNA, using Clontech SMARTer RACE 5'/3' Kit with a human TRBC gene specific primer. Following library preparation via Illumina TruSeq workflow, samples were sequenced using the Illumina MiSeq platform.

TRB, T cell receptor beta; RIN, RNA Integrity Number; T-T0, Tumor, freshly cryopreserved; T0, time zero; WT, wild-type; MT, mutant; IT-AG, intratumoral  $\alpha$ -gal glycolipids; Ipi, Ipilimumab; mo., months.
