# Supplementary material
Source: PubMed Central journal article supplement (PMC6874720)
Supplement: NIHMS1529243-supplement-Supplemental_Digital_Content_6.pdf [file NIHMS1529243-supplement-Supplemental_Digital_Content_6.pdf]

## **Supplementary Figure Legends**

**Supplementary Fig. 1** Data in plots represent the gating strategy for MAA pentamer flow cytometry analysis in a representative MT culture. Data were plotted against the time parameter to identify and exclude events acquired during unstable flow, followed by doublet discrimination. Lymphocytes were gated by Forward Scatter (FSC) and Side Scatter (SSC). Dead cell exclusion was used as needed. CD3<sup>+</sup> CD8<sup>+</sup> T cells were examined for CD8<sup>+</sup> pentamer<sup>+</sup> T cells. All gates were established on the WT sample and subsequently copied onto the MT sample.

**Supplementary Fig. 2** Patient 20 disease status, melanoma treatments, and collection time points of biological samples are indicated. IT-AG, intratumoral alpha-gal glycolipids; Ipi, Ipilimumab
